# Supplementary material for: Determinants of fibrotic atrial cardiomyopathy in atrial fibrillation. A multicenter observational study of the RETAC (reseau européen de traîtement d’arrhythmies cardiaques)-group
Source: PubMed Central journal article supplement (PMC9424172; doi:10.1007/s00392-021-01973-1), 2021-12-02
Supplement: 392_2021_1973_MOESM1_ESM.pdf [file 392_2021_1973_MOESM1_ESM.pdf]

Study Flowchart

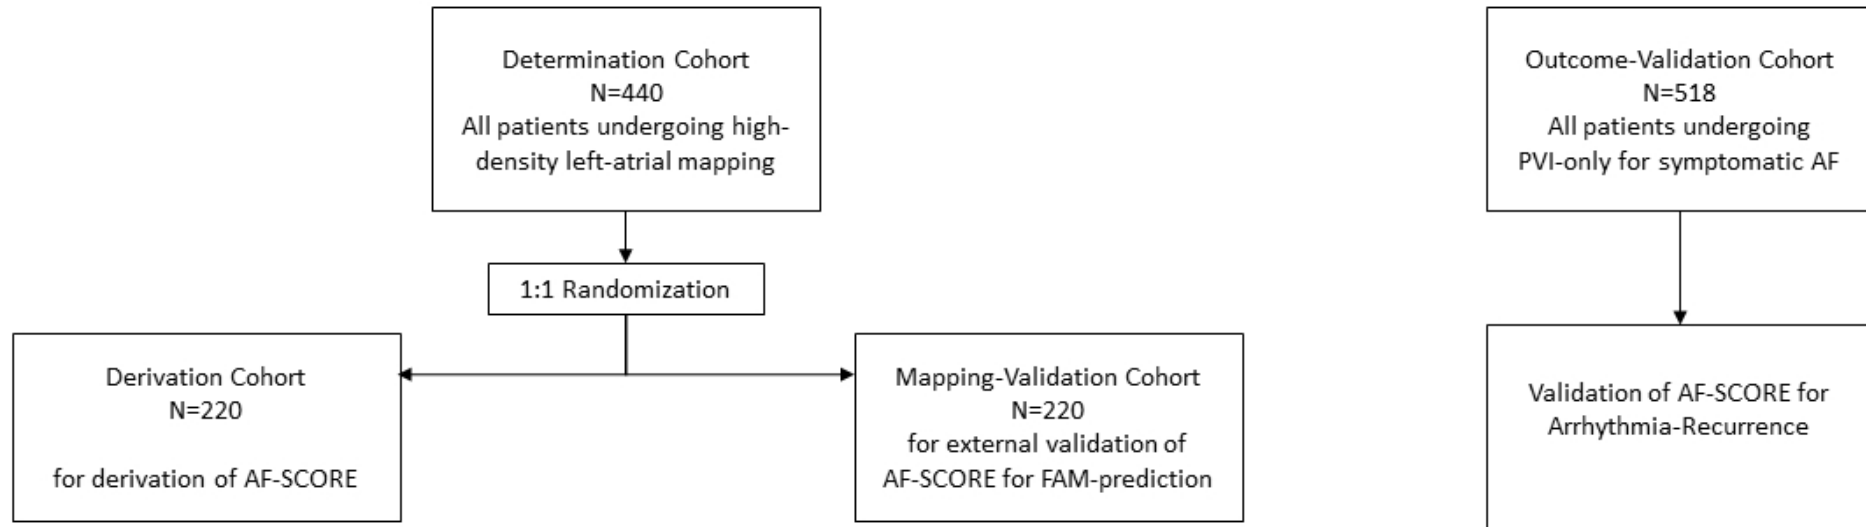

# SUPPLEMENTAL FIGURE 2

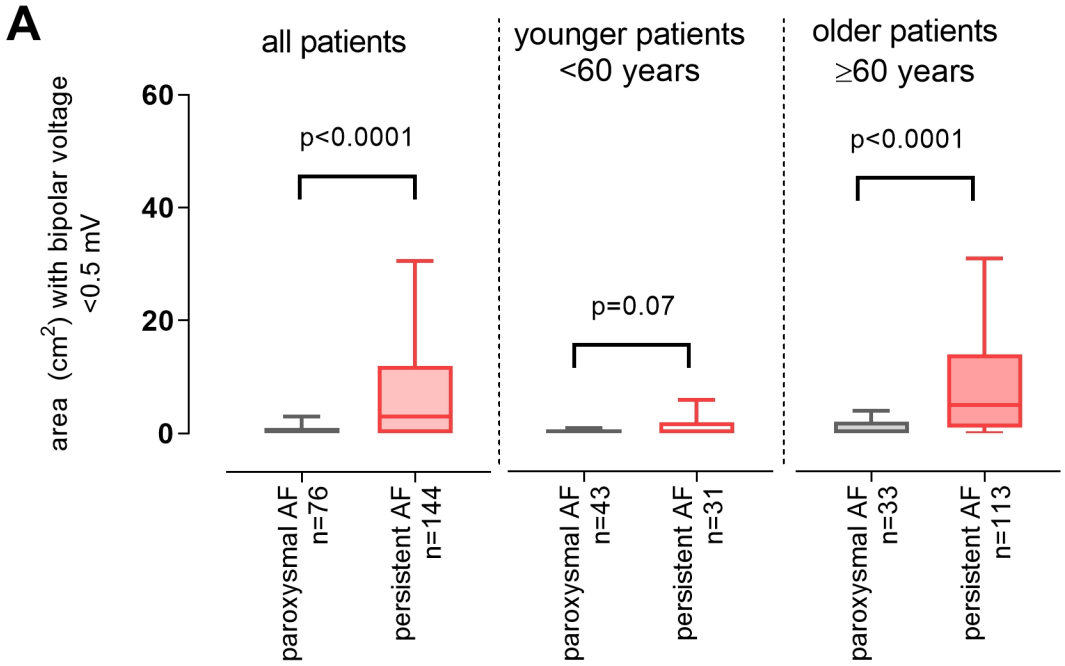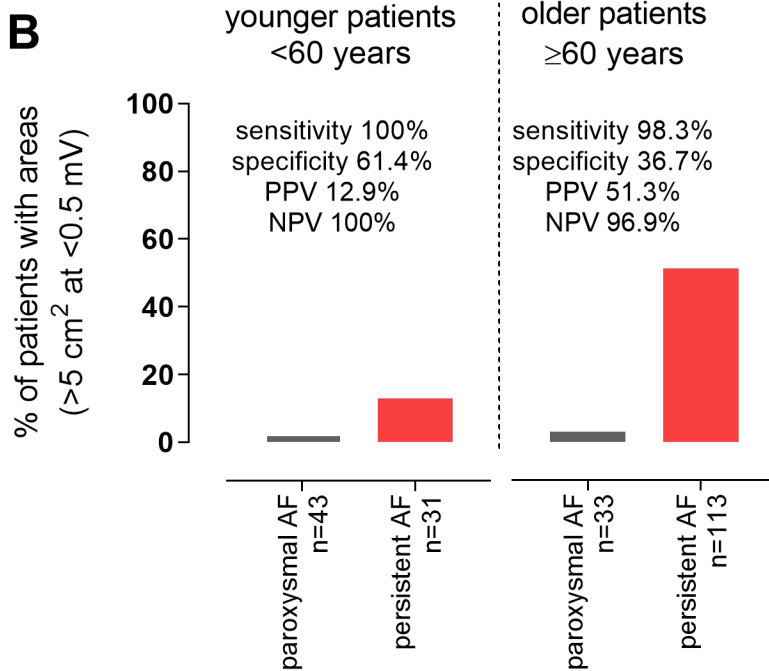

# SUPPLEMENTAL FIGURE 3

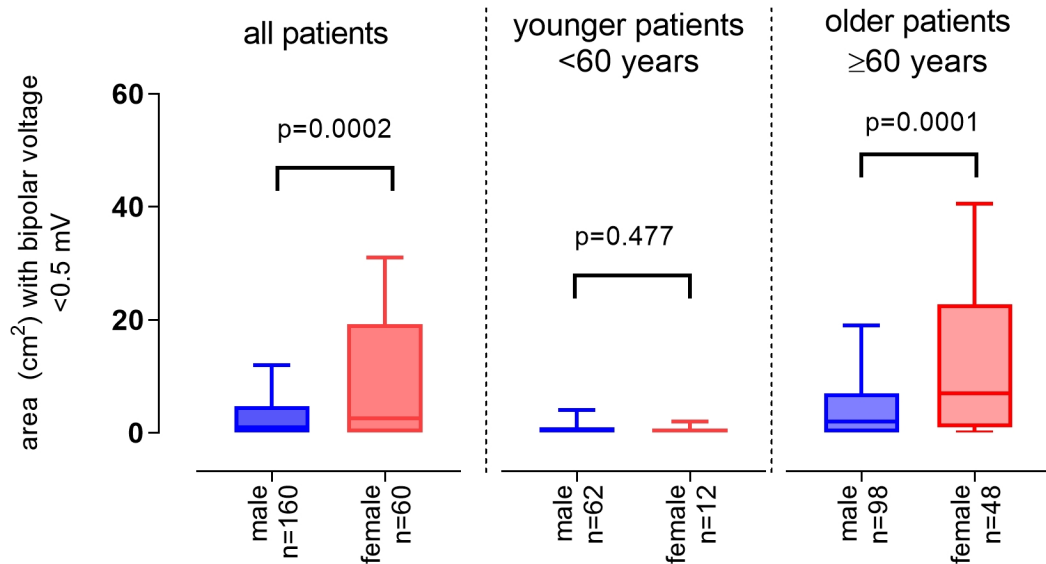

# Supplemental Figure 4

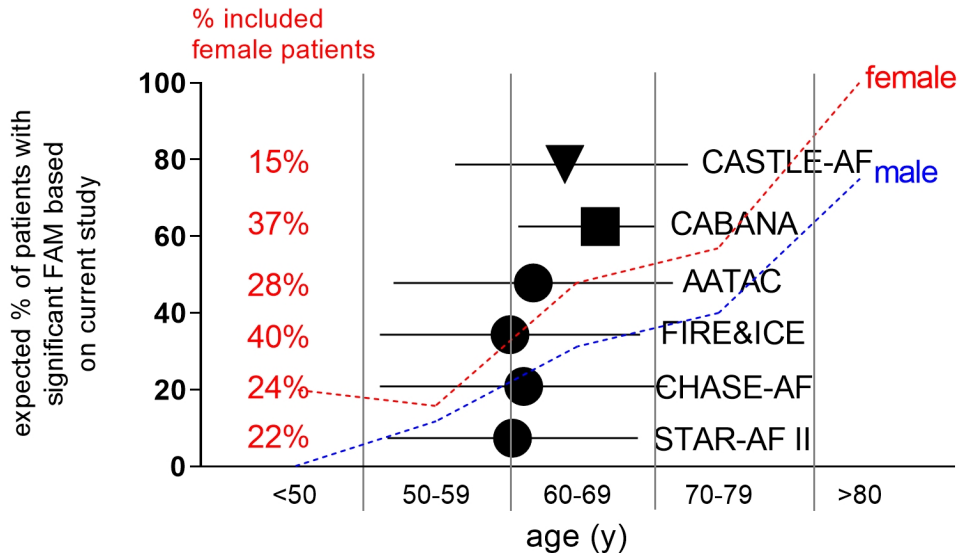

**SUPPLEMENTAL TABLE 1: Comparison of Derivation- and Mapping-Validation Cohorts**

|                                           | Derivation-Cohort<br>n=220 | Mapping-Validation<br>Cohort<br>n=220 | p     |
|-------------------------------------------|----------------------------|---------------------------------------|-------|
| Age (years)                               | 61.1 (11.7)                | 62.8 (11.1)                           | 0.112 |
| Age >60 years                             | 146 (66.4)                 | 142 (64.5)                            | 0.764 |
| Female sex                                | 60 (27.3)                  | 64 (29.1)                             | 0.751 |
| Body mass index (kg/sqm)                  | 28.0 (4.3)                 | 27.7 (4.4)                            | 0.460 |
| Arterial hypertension                     | 139 (63.2)                 | 137 (62.3)                            | 0.921 |
| Diabetes mellitus                         | 19 (8.6)                   | 24 (10.9)                             | 0.521 |
| Coronary artery disease                   | 37 (16.8)                  | 30 (13.6)                             | 0.426 |
| Persistent atrial fibrillation            | 144 (65.5)                 | 157 (71.4)                            | 0.218 |
| LV dysfunction (LVEF<45%)                 | 17 (7.7)                   | 4 (1.8)                               | 0.006 |
| LVEDD (mm)                                | 51.1 (4.4)                 | 51.0 (4.3)                            | 0.798 |
| LA dilatation (>40 mm)                    | 173 (78.6)                 | 186 (84.5)                            | 0.140 |
| Creatinine clearance (ml/min/1.73<br>sqm) | 78.3 (15.1)                | 80.0 (17.8)                           | 0.284 |
| Cumulative area <0.5 mV (sqcm)            | 6.1 (11.9)                 | 8.1 (16.1)                            | 0.138 |
| cumulative area <1.0 mV (sqcm)            | 15.2 (21.1)                | 18.8 (27.6)                           | 0.131 |

FAM, fibrotic atrial myopathy (prespecified as  $\geq 5$  cm<sup>2</sup> with bipolar voltage <0.5 mV); LA, left atrial; LV, left ventricle; LVEDD, left-ventricular end-diastolic diameter  
Values are given as mean $\pm$ standard deviation or n (%)

**SUPPLEMENTAL TABLE 2: Baseline characteristics of patients of the outcome-validation cohort**

|                                         | <b>all patients</b><br>n=518 | <b>no recurrence</b><br>n=341 | <b>recurrence</b><br>n=177 | <i>p</i> |
|-----------------------------------------|------------------------------|-------------------------------|----------------------------|----------|
| Age                                     | 62.2 (10.1)                  | 61.0 (10.2)                   | 64.5 (9.3)                 | <0.0001  |
| Female sex                              | 139 (26.6)                   | 81 (23.5)                     | 58 (32.8)                  | 0.028    |
| Persistent atrial fibrillation          | 285 (54.6)                   | 164 (47.7)                    | 120 (67.8)                 | <0.0001  |
| Ablation type                           |                              |                               |                            | <0.0001  |
| - Cryo                                  | 341 (65.3)                   | 248 (72.1)                    | 93 (52.5)                  |          |
| - Radiofrequency                        | 181 (34.7)                   | 96 (27.9)                     | 84 (47.5)                  |          |
| Structural cardiomyopathy               | 79 (15.1)                    | 54 (15.7)                     | 25 (14.1)                  | 0.696    |
| Arterial hypertension                   | 195 (43)                     | 125 (41.7)                    | 70 (39.5)                  | 0.423    |
| Left ventricular dysfunction (LVEF<45%) | 44 (8.4)                     | 25 (7.3)                      | 19 (10.7)                  | 0.181    |
| Left atrial diameter                    | 39 (12)                      | 38 (11)                       | 40 (12)                    | 0.251    |
| Pre-procedural antiarrhythmic drugs     |                              |                               |                            | 0.305    |
| - none                                  | 62 (12.1)                    | 42 (12.6)                     | 20 (11.3)                  |          |
| - amiodarone                            | 248 (48.5)                   | 151 (45.2)                    | 97 (54.8)                  |          |
| - flecainide                            | 111 (21.7)                   | 79 (23.7)                     | 32 (18.1)                  |          |
| - sotalol                               | 46 (9.0)                     | 33 (9.9)                      | 13 (7.3)                   |          |
| - other                                 | 44 (8.6)                     | 8.7                           | 15 (8.5)                   |          |
| AF-SCORE                                | 1.60 (1.45)                  | 1.38 (1.38)                   | 2.04 (1.5)                 | <0.0001  |

LVEF, left ventricular ejection fraction

Values are given as mean±standard deviation or n (%)

**SUPPLEMENTAL TABLE 3: Baseline characteristics of patients of the outcome-validation cohort according to AF-SCORE**

|                                         | n | AF-SCORE     |            |            |            |            |            |
|-----------------------------------------|---|--------------|------------|------------|------------|------------|------------|
|                                         |   | all patients | 0          | 1          | 2          | 3          | 4          |
|                                         |   | 518 (100)    | 186 (35.9) | 82 (15.8)  | 59 (11.4)  | 137 (26.4) | 54 (10.4)  |
| Age                                     |   | 62.2 (10.1)  | 51.1 (7.1) | 67.4 (5.5) | 67.8 (5.1) | 68.0 (5.0) | 70.0 (5.6) |
| Female sex                              |   | 139 (26.6)   | 25 (13.4)  | 0 (0)      | 59 (100)   | 0 (0)      | 54 (100)   |
| Persistent atrial fibrillation          |   | 285 (54.6)   | 90 (48.4)  | 0 (0)      | 0 (0)      | 137 (100)  | 54 (100)   |
| Structural cardiomyopathy               |   | 79 (15.1)    | 29 (16.9)  | 18 (22.0)  | 9 (15.3)   | 19 (19.6)  | 4 (7.4)    |
| Arterial hypertension                   |   | 195 (43)     | 61 (35.5)  | 35 (42.7)  | 21 (35.6)  | 52 (38.0)  | 26 (48.1)  |
| Left ventricular dysfunction (LVEF<45%) |   | 44 (8.4)     | 19 (11.0)  | 7 (8.5)    | 1 (1.7)    | 12 (8.8)   | 5 (11.6)   |
| Left atrial diameter                    |   | 39 (12)      | 38 (12)    | 34 (14)    | 38 (13)    | 43 (8)     | 41 (8)     |

LVEF, left ventricular ejection fraction

Values are given as mean±standard deviation or n (%)

## **Supplemental Figure 1: Study Flowchart**

## **Supplemental Figure 2: Clinical phenotype of atrial fibrillation and low-voltage substrate**

The cumulative area with bipolar voltages  $<0.5$  mV with respect to the clinical phenotype of AF in all patients of the derivation cohort (left panel), patients younger 60 years only (middle panel), and patients 60 years or older (right panel) is given in (A). The diagnostic performance of AF-phenotype to predict significant low-voltage substrate ( $>5$  cm<sup>2</sup> at  $<0.5$  mV) in younger (left panel) and patients aged 60 years or more (right panel) is shown in (B).

AF, atrial fibrillation; NPV, negative-predictive value; PPV, positive-predictive value

## **Supplemental Figure 3: Impact of sex on low-voltage substrate**

Comparison of females and males in pooled data of any age (left panel), younger patients only (middle panel) and patients aged 60 years or more (right panel).

## **Supplemental Figure 4: Study Overview of Contemporary Clinical Trials on Atrial Fibrillation-Ablation**

Shown is the reported age (in circles: mean and standard deviation; in squares: median and interquartile range; in triangles: median and range) of study patients of selected key clinical trials. The red and blue dashed lines visualize the percentage of patients that can be expected to have significant FAM (defined as  $>5$  cm<sup>2</sup> of area with bipolar voltages  $<0.5$  mV) based on the current study. On the left hand side in red is given the reported percentage of female



patients that were included in the given trials. For CHASE-AF e.g., only 24% of included patients were female. At a mean age of 62 years with a large male predominance, around 20% of patients in this trial likely had significant FAM.

FAM, fibrotic atrial myopathy

### **Supplemental Table 1: Comparison of Derivation- and Mapping-Validation Cohorts**

### **Supplemental Table 2: Baseline characteristics of patients of the outcome-validation cohort**

### **Supplemental Table 3: Baseline characteristics of patients of the outcome-validation cohort according to AF-SCORE**
